# Supplementary material for: Facet junction engineering for enhanced SERS activity of Ag/Cu2O composite substrates
Source: Royal Society of Chemistry journal article supplement (doi:10.1039/d4cp01538j), 2024-01-01
Supplement: d4cp01538j1.pdf [file d4cp01538j1.pdf]

Supporting Information for

**Facet junction engineering for enhanced SERS activity of**

**Ag/Cu<sub>2</sub>O composite substrates**

Ming Zhou, Xunfei He, Yinyan Gong\*, Can Li, and Lengyuan Niu

Institute of Optoelectronic Materials and Devices, College of Optical and Electronic  
Technology, China Jiliang University, Hangzhou 310018, China

Email address: 13A0502075@cjlu.edu.cn

## **S1 Experimental Section**

### **S1.1 Materials**

Cupric chloride dihydrate (CuCl<sub>2</sub>·2H<sub>2</sub>O), sodium hydroxide (NaOH), ascorbic acid (AA), silver nitrate (AgNO<sub>3</sub>), ethanol, 4-nitrobenzenethiol (4-NBT), rhodamine 6G (R6G), and crystal violet (CV) were purchased from aladdin (Shanghai) Co., Ltd. sodium citrate was purchased from McLean Biochemical Technology Co., Ltd. Polyvinylpyrrolidone (PVP K30) was purchased from Sinopharm Chemical Reagent Co., Ltd.

### **S1.2 Synthesis of Cu<sub>2</sub>O Polyhedrons**

Well-shaped Cu<sub>2</sub>O nanocrystals of different morphology were prepared by a liquid-phase reduction method [1] with slight modification. To synthesis truncated-octahedral Cu<sub>2</sub>O nanocrystals with co-exposed {100} and {111} facets (labeled as Cu<sub>2</sub>O(J)), 3.33 g PVP was dissolved in aqueous solution of CuCl<sub>2</sub>·2H<sub>2</sub>O (100 mL, 0.01 M), followed by addition of NaOH solution (10 mL, 2 M). After 30 min, ascorbic acid solution (20 mL, 0.60 M) was added dropwisely to the obtained brownish suspension, and the mixture was aged for 60 min. The whole synthesis process was kept at 55 °C in water bath under magnetic stirring. The resulting products were collected, washed thoroughly by deionized water and ethanol, and dried in vacuum oven. Cube-shaped Cu<sub>2</sub>O enclosed by {100} facets (Cu<sub>2</sub>O(C)) and octahedron-shaped Cu<sub>2</sub>O enclosed by {111} facets (Cu<sub>2</sub>O(O)) were synthesized under

similar conditions except that 0 g and 4.44 g PVP were used, respectively.

SEM images in Figs. S1a-S1c confirmed successful preparation of cubic, truncated-octahedral and octahedral nanocrystals by using 0 g, 3.33 g and 4.44 g of PVP. Moreover, measured XRD patterns of all the three samples matched well with Cu<sub>2</sub>O in cubic phase (PDF# 99-0041), and there is no diffraction signals originated from impurity phase (Fig. S1d).

### S1.3 Calculation of Enhancement Factor

Enhancement factor (EF) was calculated based on the following equations [2]:

$$EF = \left( \frac{I_{SERS}}{N_{SERS}} \right) / \left( \frac{I_{NR}}{N_{NR}} \right) \quad (1)$$

$$N_{SERS} = (N_{AV} \times A_{beam}) / \sigma \quad (2)$$

$$N_{NR} = C_{NR} \times V \times \left( \frac{A_{beam}}{A} \right) \times N_{AV} \quad (3)$$

where  $I_{SERS}$  and  $I_{NR}$  represent the integrated intensity of SERS and normal Raman peaks, respectively. To measure the normal Raman spectrum, 4-NBT solution ( $5 \times 10^{-4}$  M) was drop-cast on Si wafer, and the exposure time, laser power (at sample), and accumulation were set as 30 s, 0.56 mW, and 8, respectively.  $N_{AV}$  is the Avogadro constant,  $\sigma$  is the surface area occupied by self-assembled monolayer of probe molecule ( $=3.0 \times 10^9$  cm<sup>2</sup>/mol for 4-NBT [3]), and  $A_{beam}$  is the effective area under laser irradiation which is estimated by  $A_{beam} = \pi(1.22\lambda/2NA)^2$ .  $C_{NR}$  and  $V$  represent the concentration and volume of 4-NBT solution used for normal Raman spectra measurements, and  $A$  is the area formed by the solution on Si wafer. For 4-NBT, the integrated intensity of the dominant 1337 cm<sup>-1</sup> peak equal to 3,756,060 (Fig.4b) and 8,124 (Fig. 4a) for SERS and normal Raman respectively. By substituting these values into equations (1-3), EF is calculated to be  $5.3 \times 10^5$ .

## S2 Supplementary Figures

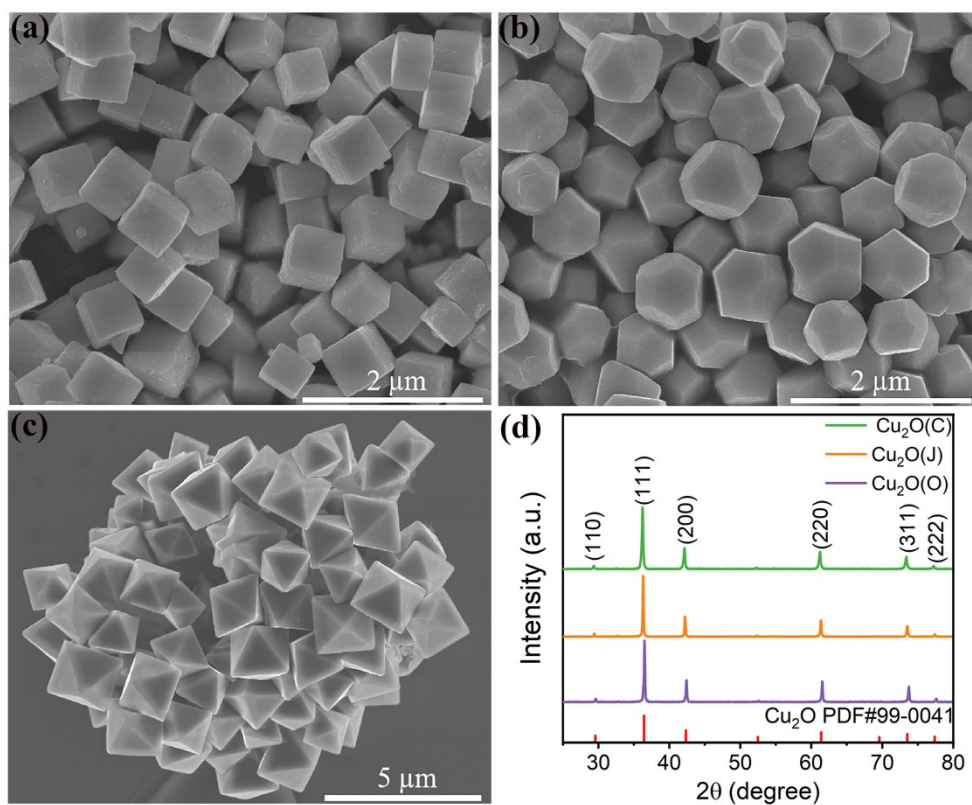

**Fig. S1** (a-c) SEM images and (d) XRD curves of Cu<sub>2</sub>O(C), Cu<sub>2</sub>O(J) and Cu<sub>2</sub>O(O), respectively.

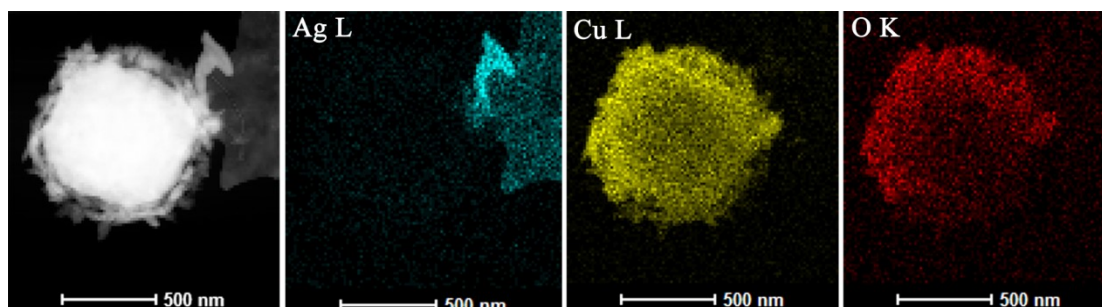

**Fig. S2** Energy dispersive X-ray (EDX) elemental mapping of Ag, Cu and O in Ag/Cu<sub>2</sub>O(J3).

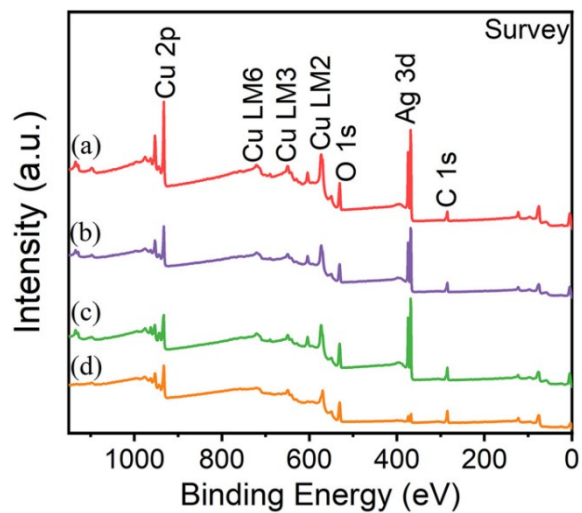

**Fig. S3** XPS survey spectra of (a)Ag/Cu<sub>2</sub>O(O), (b)Ag/Cu<sub>2</sub>O(C), (c)Ag/Cu<sub>2</sub>O(J3) and (d) Ag/Cu<sub>2</sub>O(J1).

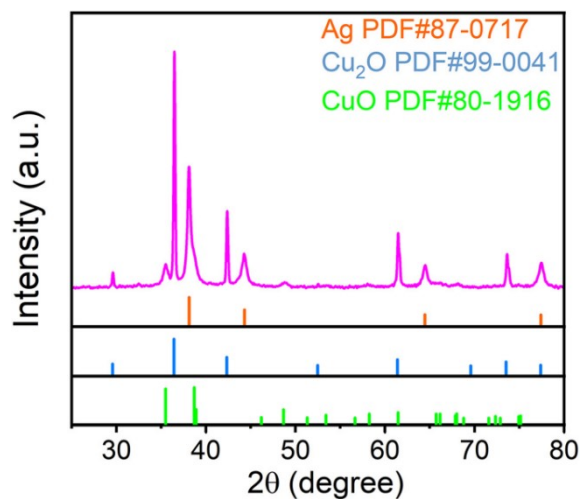

**Fig. S4** XRD of Ag-decorated Cu<sub>2</sub>O(J) prepared without the incorporation of sodium citrate.

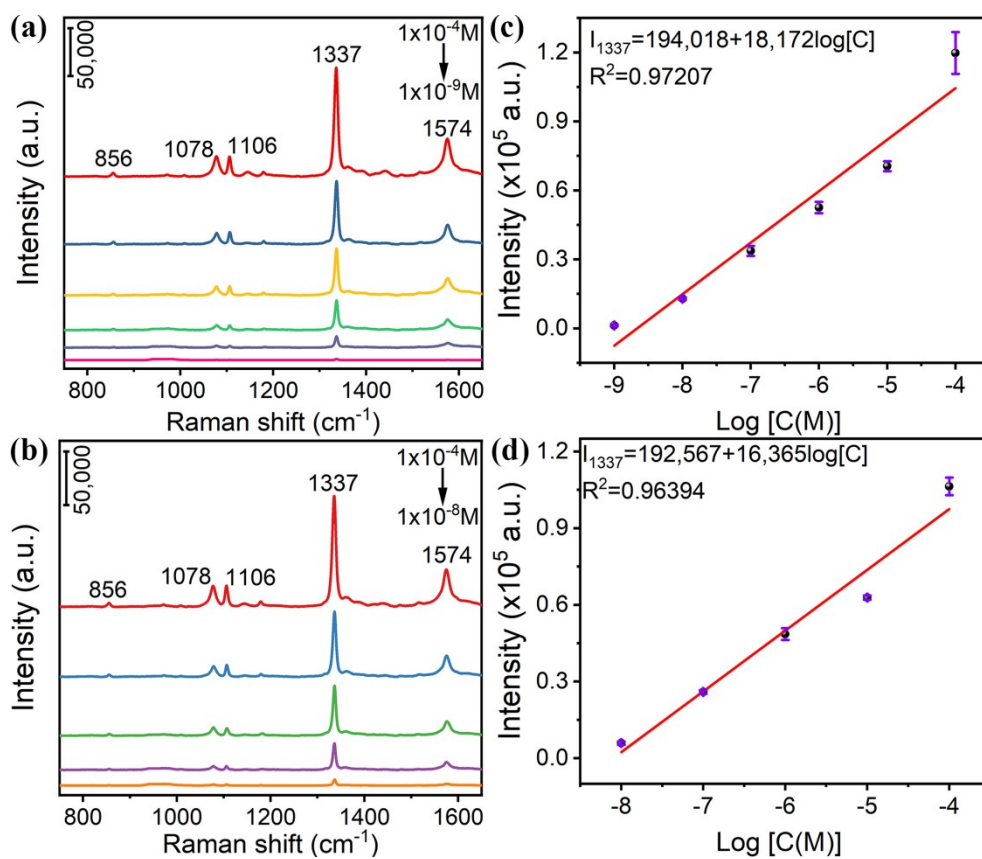

**Fig. S5** (a, c) Concentration-dependent SERS spectra of 4-NBT on Ag/Cu<sub>2</sub>O(C) and Ag/Cu<sub>2</sub>O(O), respectively. (b, d) linear fitting of  $I_{1337}$  versus concentration for Ag/Cu<sub>2</sub>O(C) and Ag/Cu<sub>2</sub>O(O), respectively.

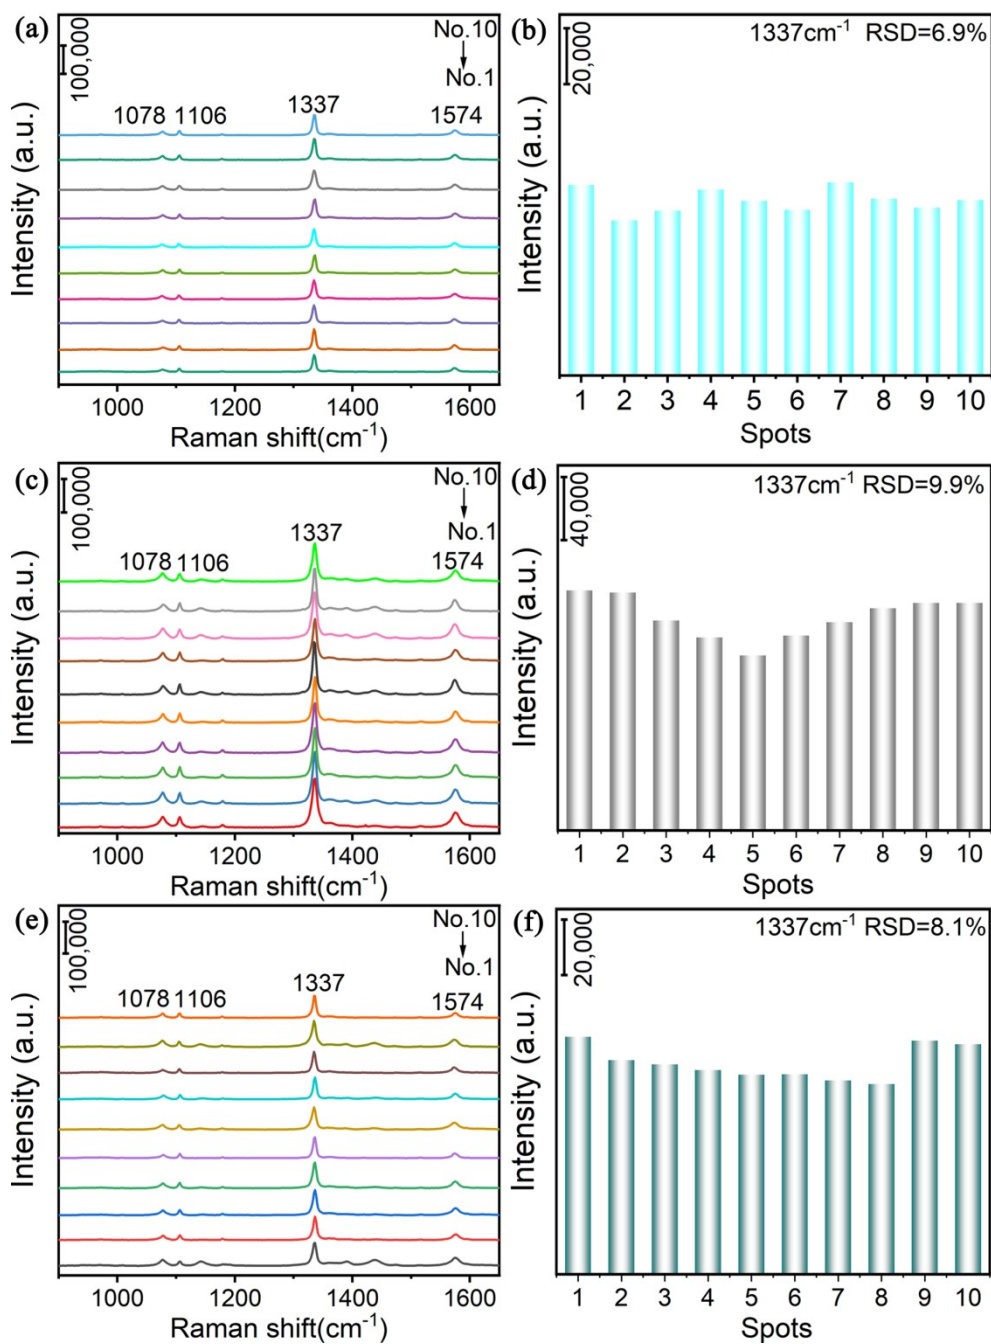

**Fig. S6** SERS spectra of  $1 \times 10^{-4}$  M 4-NBT on (a) Ag/Cu<sub>2</sub>O(J1), (c) Ag/Cu<sub>2</sub>O(J2) and (e) Ag/Cu<sub>2</sub>O(J4) acquired from ten randomly selected regions, (b, d, f)  $I_{1337}$  of different spots.

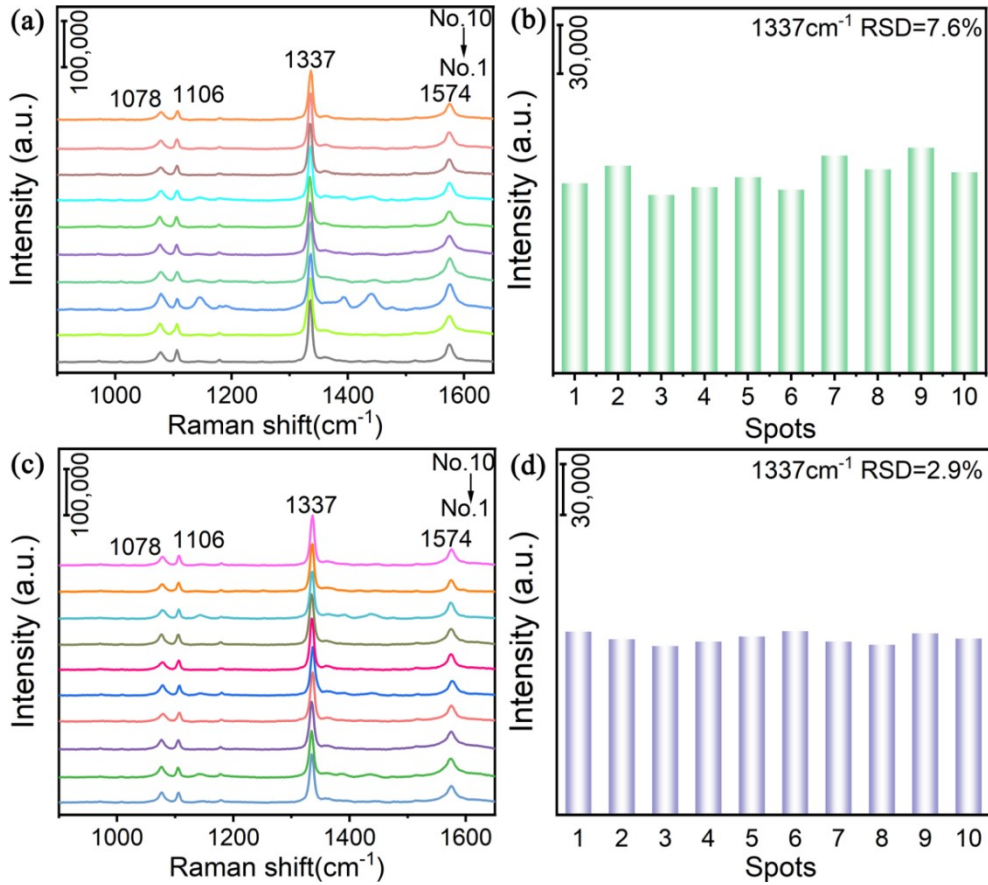

**Fig. S7** SERS spectra of  $1 \times 10^{-4}$  M 4-NBT on (a) Ag/Cu<sub>2</sub>O(C) and (c) Ag/Cu<sub>2</sub>O(O) acquired from ten randomly selected regions, (b, d)  $I_{1337}$  of different spots.

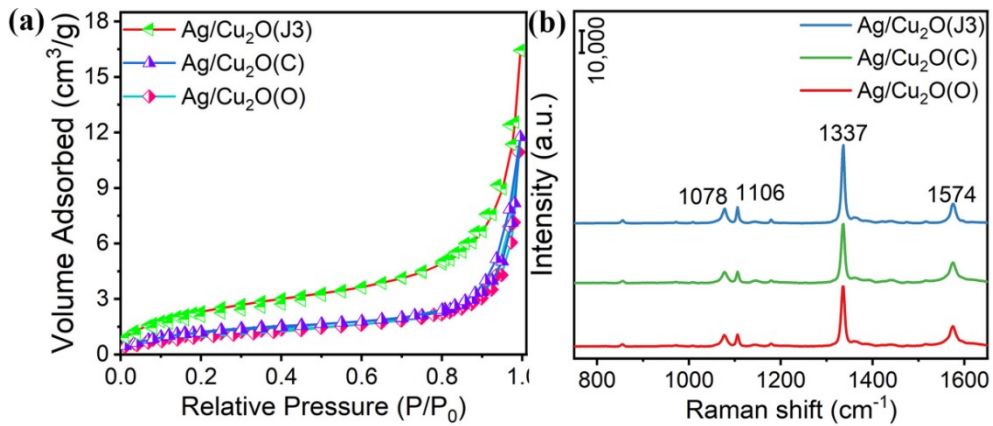

**Fig. S8** (a) N<sub>2</sub> adsorption-desorption isotherms (b) normalized SERS spectra of Ag/Cu<sub>2</sub>O(C), Ag/Cu<sub>2</sub>O(J3) and Ag/Cu<sub>2</sub>O(O).

### S3 Supplementary Tables

**Table S1** Synthesis conditions of Ag-decorated Cu<sub>2</sub>O nanocrystals

| Sample                   | PVP (g) | Cu <sub>2</sub> O nanocrystal | AgNO <sub>3</sub> (mmol) |
|--------------------------|---------|-------------------------------|--------------------------|
| Cu <sub>2</sub> O(C)     | 0       | /                             | /                        |
| Cu <sub>2</sub> O(J)     | 3.33    | /                             | /                        |
| Cu <sub>2</sub> O(O)     | 4.44    | /                             | /                        |
| Ag/Cu <sub>2</sub> O(J1) | /       | Truncated-octahedrons         | 0.02                     |
| Ag/Cu <sub>2</sub> O(J2) | /       | Truncated-octahedrons         | 0.04                     |
| Ag/Cu <sub>2</sub> O(J3) | /       | Truncated-octahedrons         | 0.08                     |
| Ag/Cu <sub>2</sub> O(J4) | /       | Truncated-octahedrons         | 0.12                     |
| Ag/Cu <sub>2</sub> O(C)  | /       | cubes                         | 0.08                     |
| Ag/Cu <sub>2</sub> O(O)  | /       | octahedrons                   | 0.08                     |

Table. S2. Comparison of sensitivity and detection limit with several substrates in literature.

| Material                                          | Analytes      | EF                  | LOD (M)              | Excitation (nm) | Reference        |
|---------------------------------------------------|---------------|---------------------|----------------------|-----------------|------------------|
| Au/H-g-C <sub>3</sub> N <sub>4</sub>              | CV            | 6.8×10 <sup>5</sup> | 2.7×10 <sup>-9</sup> | 785             | 4                |
| TiO <sub>2</sub> -Ag-GO                           | CV            | 7.8×10 <sup>5</sup> | 1×10 <sup>-10</sup>  | 785             | 5                |
| Au@TiO <sub>2</sub> NRAs                          | R6G           | 10 <sup>4</sup>     | 1×10 <sup>-7</sup>   | 785             | 6                |
| SiO <sub>2</sub> @Au NPs                          | R6G           | 1.5×10 <sup>6</sup> | 1×10 <sup>-8</sup>   | 633             | 7                |
| Flower-like MoS <sub>2</sub> @Ag                  | 4-MBA         | 1.1×10 <sup>6</sup> | 1×10 <sup>-10</sup>  | 532             | 8                |
| Ti <sub>3</sub> C <sub>2</sub> T <sub>x</sub> /Ag | 4-NBT         | 4.2×10 <sup>5</sup> | 1×10 <sup>-11</sup>  | 532             | 9                |
| Fe <sub>3</sub> O <sub>4</sub> @COF@Ag            | Ciprofloxacin | /                   | 1×10 <sup>-9</sup>   | /               | 10               |
| Fe <sub>3</sub> O <sub>4</sub> @PEI-DTC-Ag        | thiram        | /                   | 1×10 <sup>-9</sup>   | /               | 11               |
| Ag/Cu <sub>2</sub> O(J3)                          | 4-NBT         | 5.3×10 <sup>5</sup> | 1×10 <sup>-11</sup>  | 532             | <b>This work</b> |



## References

- [1] D.-F. Zhang, H. Zhang, L. Guo, K. Zheng, X.-D. Han, Z. Zhang, *J. Mater. Chem.*, 2009, **19**, 5220-5225.
- [2] X. Wang, W. Shi, Z. Jin, W. Huang, J. Lin, G. Ma, S. Li, L. Guo, *Angew. Chem. Int. Edit.*, 2017, **56**, 9851-9855.
- [3] J. Huang, Y. Zhu, M. Lin, Q. Wang, L. Zhao, Y. Yang, K.X. Yao, Y. Han, *J. Am. Chem. Soc.*, 2013, **135**, 8552-8561.
- [4] W. Tang, Y. An, K.H. Row, *Chem. Eng. J.*, 2020, **402**, 126194.
- [5] M. Zhang, T. Chen, Y. Liu, J. Zhang, H. Sun, J. Yang, J. Zhu, J. Liu, and Y. Wu, *ACS Sensors*, 2018, **3**, 2446-2454
- [6] Z. Xie, F. Zhao, S. Zou, F. Zhu, W. Wang, Z. Zhang, *J. Alloy. Compd.*, 2021, **861**, 157999.
- [7] D. Song, T. Wang, L. Zhuang, *Nanomaterials*, 2023, **13** 2156.
- [8] Y. Chen, H. Liu, Y. Tian, Y. Du, Y. Ma, S. Zeng, C. Gu, T. Jiang, and J. Zhou, *ACS Appl. Mater. Interfaces*, 2020, **12** 14386–14399.
- [9] X. Xue, L. Chen, C. Zhao, M. Lu, Y. Qiao, J. Wang, J. Shi, L. Chang, *Spectrochim. Acta. A*, 2023, **302**, 123019.
- [10] Z. Yang, G. Chen, C. Ma, J. Gu, C. Zhu, L. Li, H. Gao, *Talanta*, 2023, **263** 124725.
- [11] K. Liu, W. Feng, Y. Li, D. Han, T. Wu, K. Li, S. Yang, *J Photoch. Photobio. A-Chem.*, 2024, **454**, 115696.
